# Supplementary material
Source: PubMed Central journal article supplement (PMC4292478)
Supplement: AEM.03213-14_zam999105974so1.pdf [file AEM.03213-14_zam999105974so1.pdf]

Supplemental Materials

1 **Supplemental Materials**

2 **Journal:** Applied and Environmental Microbiology

3 **Title:** Effects of eliminating pyruvate node pathways, and co-expression of heterogeneous  
4 carboxylation enzymes, on succinate production by *Enterobacter aerogenes*

5

6 **Author names:**

7 Yoshinori Tajima<sup>a,#</sup>, Yoko Yamamoto<sup>a</sup>, Keita Fukui<sup>a</sup>, Yousuke Nishio<sup>a</sup>, Kenichi  
8 Hashiguchi<sup>b</sup>, Yoshihiro Usuda<sup>a</sup>, Koji Sode<sup>c</sup>

9

10 **Affiliation of the corresponding author:**

11 Institute for Innovation, Ajinomoto Co., Inc., 1-1 Suzuki-cho, Kawasaki-ku, Kawasaki  
12 210-8681, Japan.

13

14 **E-mail address of the corresponding author:**

15 [yoshinori\\_tajima@ajinomoto.com](mailto:yoshinori_tajima@ajinomoto.com)

16

17

18

19

20

21

22

23

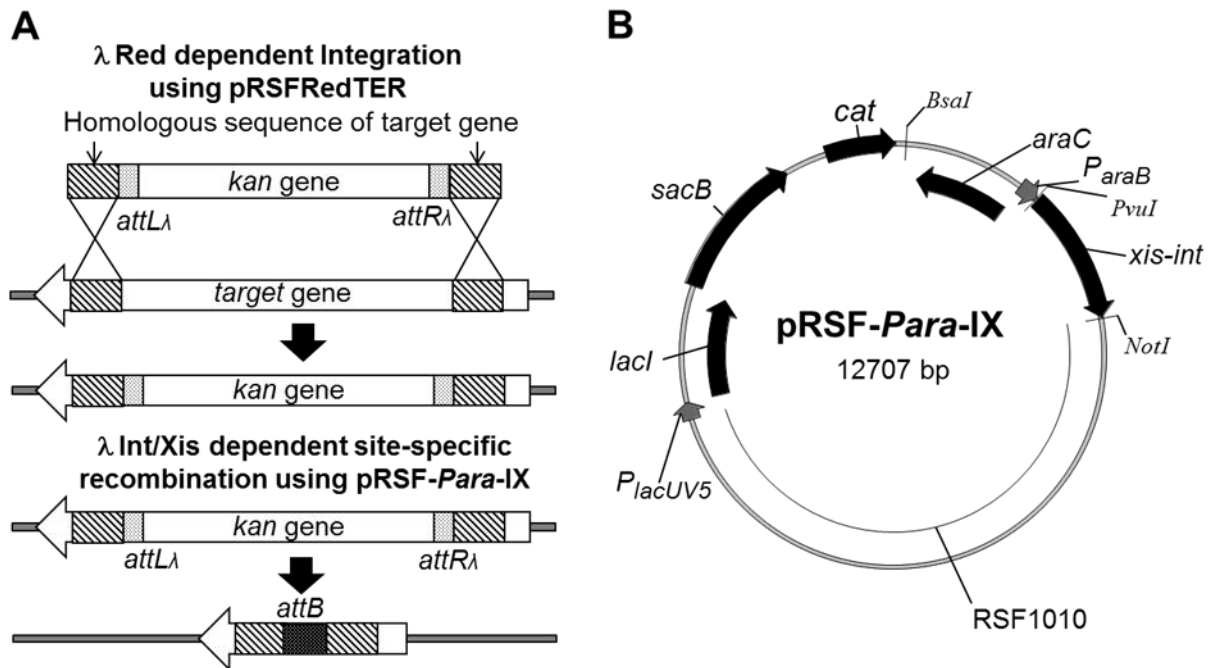

Fig. S1

1

2 Fig. S1.

3 A) Schematic of the  $\lambda$  Red recombination system

4 The kanamycin resistant gene (*kan*) flanked by *attL $\lambda$* /*attR $\lambda$*  was used as the selection marker.

5 A DNA fragment containing 60-nt sequences homologous to the target region was

6 introduced into the target gene on the chromosome via  $\lambda$  Red-dependent homologous

7 recombination. The *kan* gene was then eliminated from the chromosome by

8  $\lambda$  Int/Xis-dependent site specific recombination leaving the *attB* site on the chromosome.

9 B) Plasmid map of pRSF-*Para-IX*

10 pRSF-*Para-IX* was used for removal of the *kan* gene from the *E. aerogenes* chromosome.

11 The vector length was 12707 bp, and contained the broad-host-range replicon RSF1010 and

12 *sacB* gene under the control of the lacUV5 promoter derived from pRSFRedTER. The

## Supplemental Materials

- 1 arabinose promoter region containing the *araC* gene and *araB* promoter, derived from
- 2 pKD46, was integrated into the *BsaI* and *PvuI* site. The *xis-int* region derived from
- 3 pMW-intxis-ts was integrated into the *PvuI* and *NotI* site.
- 4
